# Supplementary material
Source: publisher site journal article supplement (https://www.spandidos-publications.com/5439/downloadSupplementary)

Figure S1. The expression levels of miR-7 and miR-153 following mimics treatment. (A) Fold changes of miR-7 and miR-153 were assessed by RT-qPCR when miR-7, miR-153 or miR-7 and miR-153 together were transfected in GES-1/HP cells. \*\*\*P<0.001, ns, not significant. (B) Fold changes of miR-7 and miR-153 were assessed by RT-qPCR when miR-7, miR-153 or miR-7 and miR-153 together were transfected in *H. pylori*-infected HGC-27 cells. \*\*\*P<0.001, ns, not significant. miR, microRNA; RT-qPCR, reverse transcription-quantitative PCR; *H. pylori*, *Helicobacter pylori*.

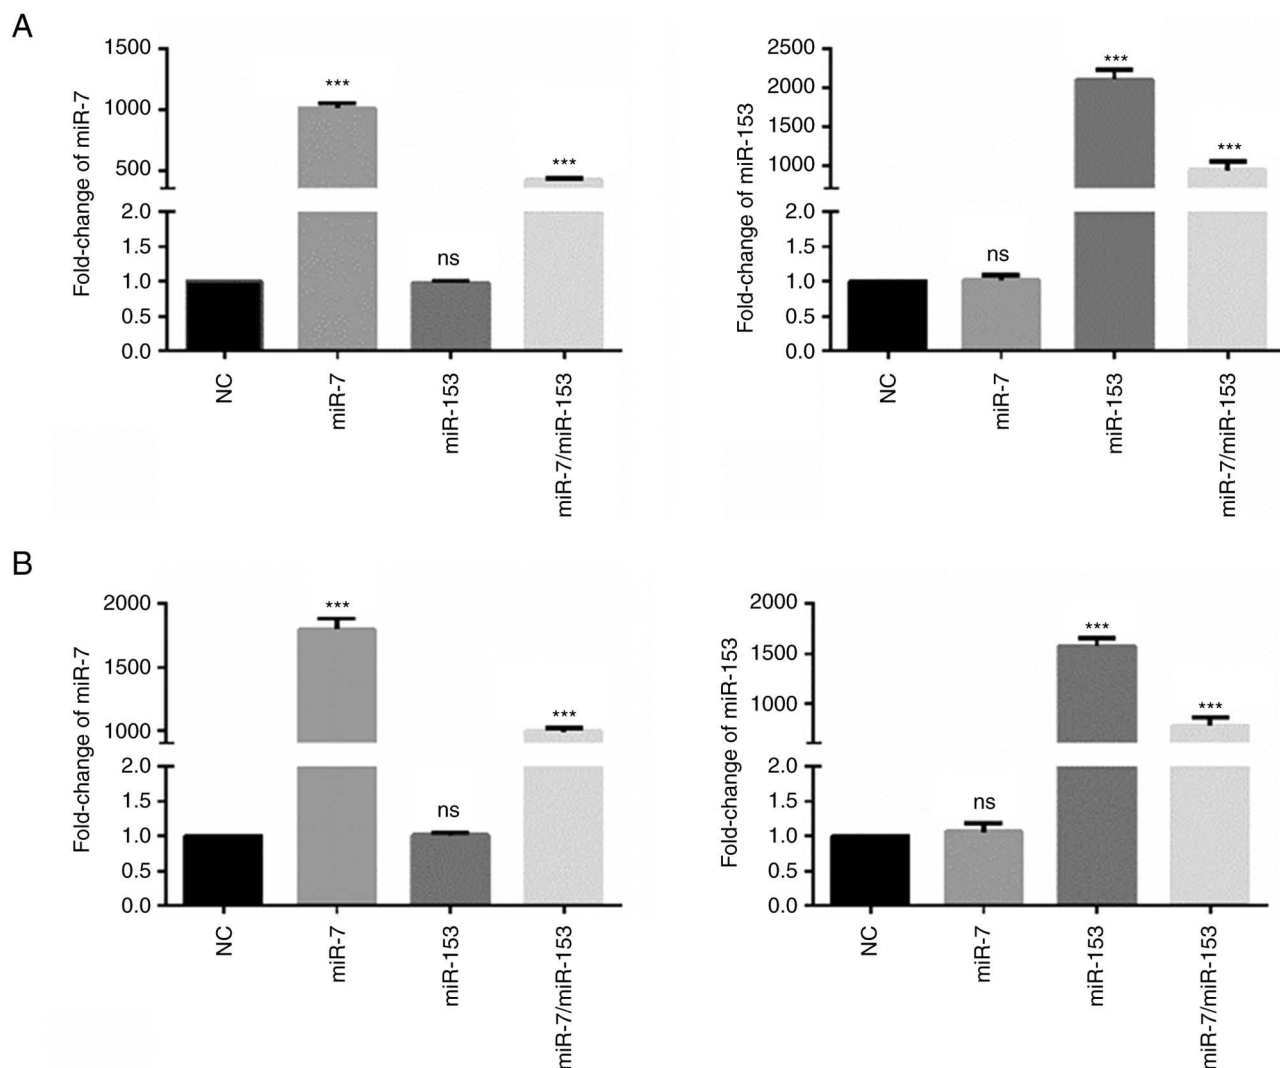

Figure S2. Roles of miR-7 and miR-153 combination in HGC-27 cells under *H. pylori* infection. (A) Apoptosis analysis. \* $P < 0.05$ , \*\* $P < 0.01$ , \*\*\* $P < 0.001$ . (B) EdU assay. \* $P < 0.01$ , \*\* $P < 0.001$ . Scale bar, 500  $\mu\text{m}$ . (C) Clone formation assay. \* $P < 0.05$ , \*\* $P < 0.001$ . (D) Cell cycle analysis. \* $P < 0.05$ , \*\* $P < 0.01$ . (E) Changes of apoptosis, autophagy, cell proliferation and cell cycle related protein determined by western blotting. miR, microRNA; RT-qPCR, reverse transcription-quantitative PCR; *H. pylori*, *Helicobacter pylori*; NC, negative control.

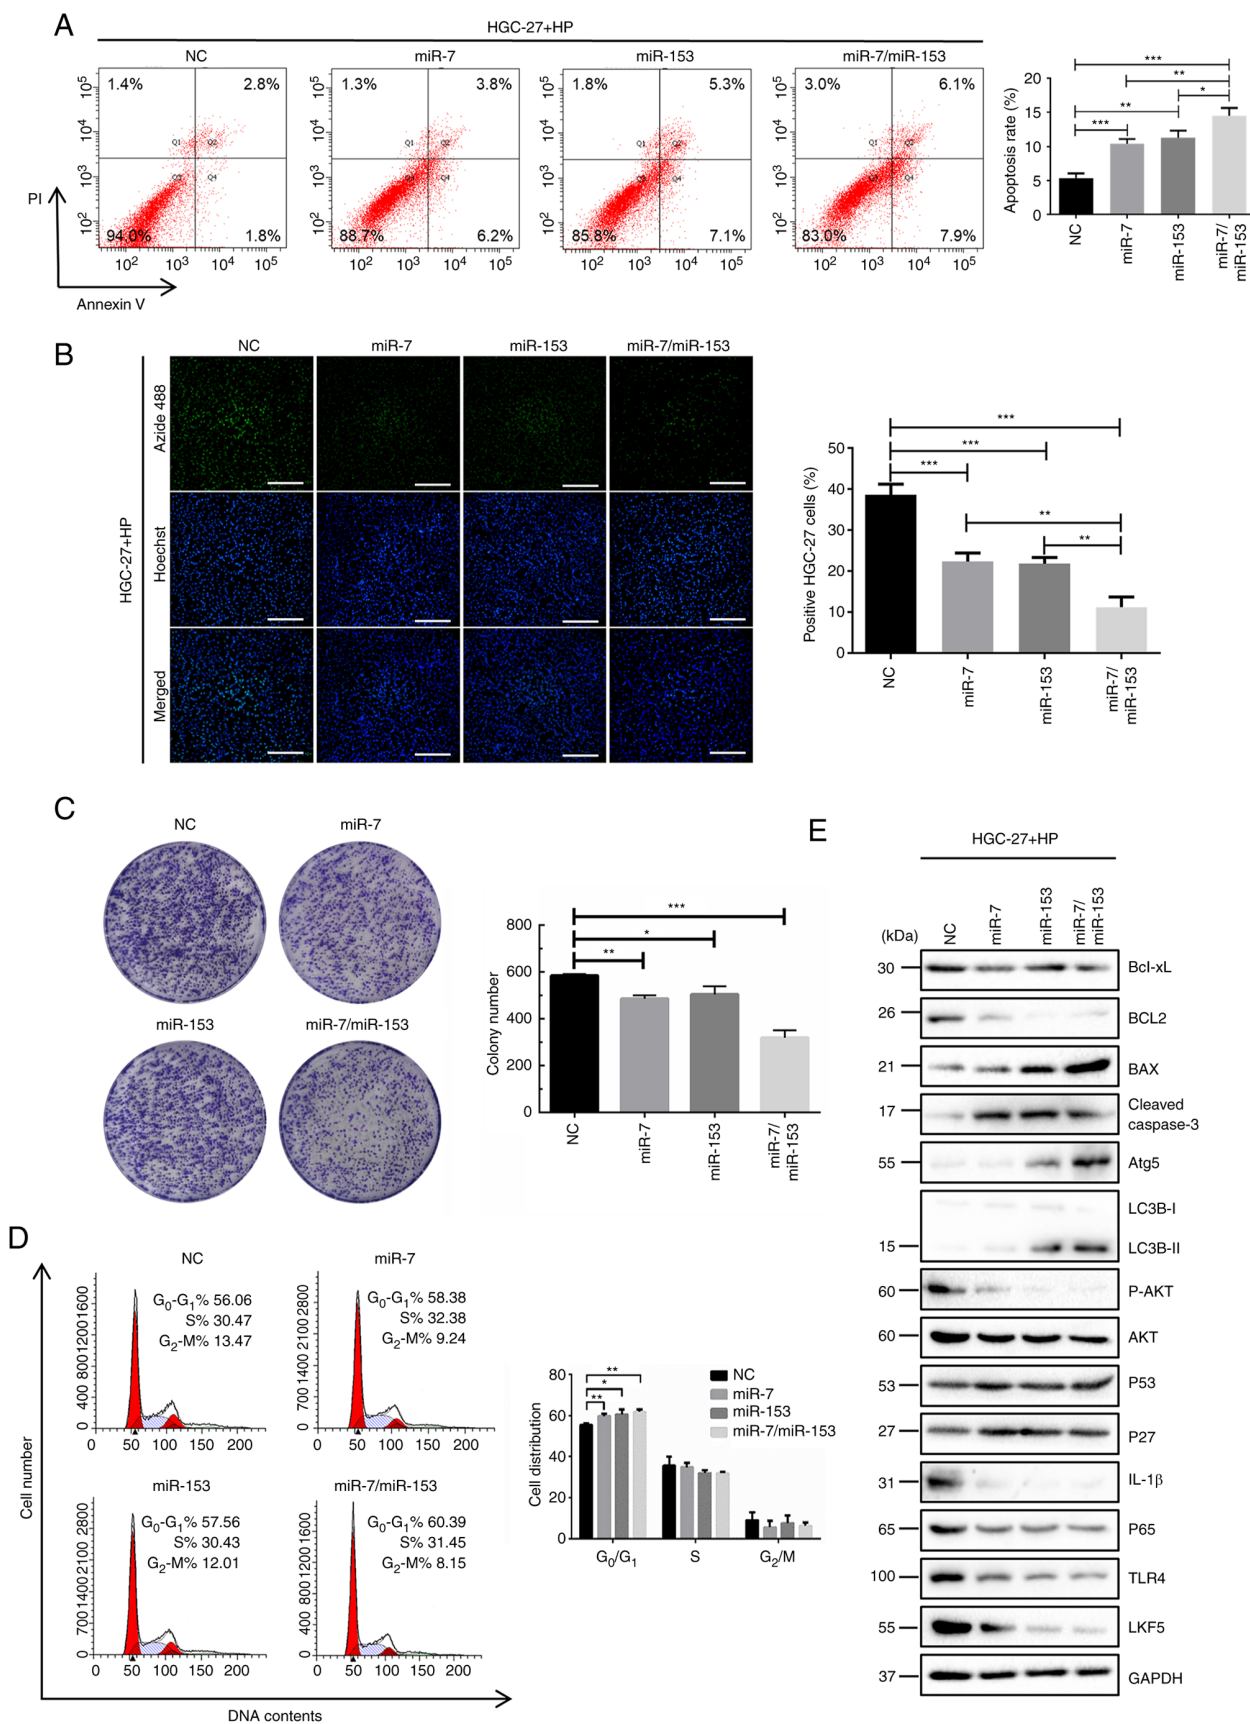

Supplement: Supplementary file 1 [file downloadSupplementary]
